# Supplementary material for: Exploring How Exposure to Truth and State-Sponsored Anti-Tobacco Media Campaigns Affect Smoking Disparities among Young Adults Using a National Longitudinal Dataset, 2002–2017
Source: MDPI journal article supplement (doi:10.3390/ijerph18157803), 2021-07-23
Supplement: s1 [file s1]

**Table S1.** Sensitivity Analysis Including Follow-Up Characteristics. Relative Risk in Media Exposure (State+Truth) on Any Smoking Initiation and Daily Initiation at Modal Age 19/20, Monitoring the Future Longitudinal Sample, Baseline year 2001-2015. Results Reflect Imputed Data (m=10).

|                                                         | <b>Any Smoking initiation</b> |         | <b>Daily smoking initiation</b> |         |
|---------------------------------------------------------|-------------------------------|---------|---------------------------------|---------|
|                                                         | RR (95% CI)                   | P value | RR (95% CI)                     | P value |
| <i>12 month non-depreciated (vs. &lt;25 percentile)</i> |                               |         |                                 |         |
| 25-50 percentile                                        | 0.83 (0.52,1.33)              | 0.087   | 1.29 (0.95,1.76)                | 0.201   |
| 50-75 percentile                                        | 1.08 (0.70,1.68)              |         | 1.31 (0.96,1.79)                |         |
| >75 percentile                                          | 1.23 (0.82,1.85)              |         | 1.09 (0.78,1.52)                |         |
| N                                                       | 7138                          |         | 11412                           |         |

**Table S2.** Additive P-values Associated with Interaction Terms between Media Campaign Exposure and Follow-Up Characteristics for Any Smoking Participation, and Daily Smoking Initiation at Modal Age 19/20, Monitoring the Future Longitudinal Sample, Baseline year 2001-2015. Results Reflect Imputed Data (m=10).

|                           | <b>Any Smoking initiation</b> | <b>Daily smoking initiation</b> |
|---------------------------|-------------------------------|---------------------------------|
| Attended a 4-year college | 0.911                         | 0.348                           |
| Employment status         | 0.864                         | 0.408                           |
| Full time student         | 0.870                         | 0.488                           |
| N                         | 7138                          | 11412                           |

**Table S3.** Relative Risk in Media Exposure (State+Truth) on Any Smoking Initiation and Daily Initiation at Modal Age 19/20, Monitoring the Future Longitudinal Sample, Baseline year 2001-2015. Results Reflect Complete Cases.

|                                                         | <b>Any Smoking initiation</b> |              | <b>Daily smoking initiation</b> |         |
|---------------------------------------------------------|-------------------------------|--------------|---------------------------------|---------|
|                                                         | RR (95% CI)                   | P value      | RR (95% CI)                     | P value |
| <i>12 month non-depreciated (vs. &lt;25 percentile)</i> |                               |              |                                 |         |
| 25-50 percentile                                        | 1.00 (0.68,1.47)              | <b>0.031</b> | 1.21 (0.86,1.71)                | 0.253   |
| 50-75 percentile                                        | 1.41 (0.98,2.03)              |              | 1.28 (0.91,1.79)                |         |
| >75 percentile                                          | <b>1.43 (1.01,2.03)</b>       |              | 1.00 (0.71,1.42)                |         |
| N                                                       | 6686                          |              | 10668                           |         |
